# Supplementary material
Source: ML conference proceedings conference paper supplement (https://openreview.net/forum?id=Ex3oJEKS53)

# ASDL: A Unified Interface for Gradient Preconditioning in PyTorch

Kazuki Osawa<sup>1</sup>, Satoki Ishikawa<sup>2</sup>, Rio Yokota<sup>2</sup>, Shigang Li<sup>3</sup>, and Torsten Hoefler<sup>1</sup>

<sup>1</sup>: ETH Zurich (Scalable Parallel Computing Lab), <sup>2</sup>: Tokyo Institute of Technology, <sup>3</sup>: Beijing University of Posts and Telecommunications

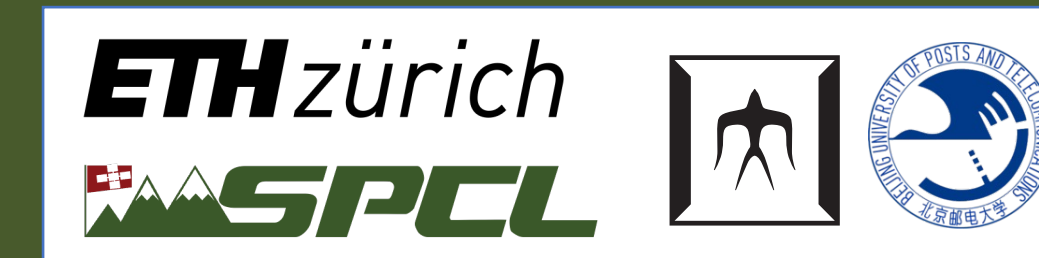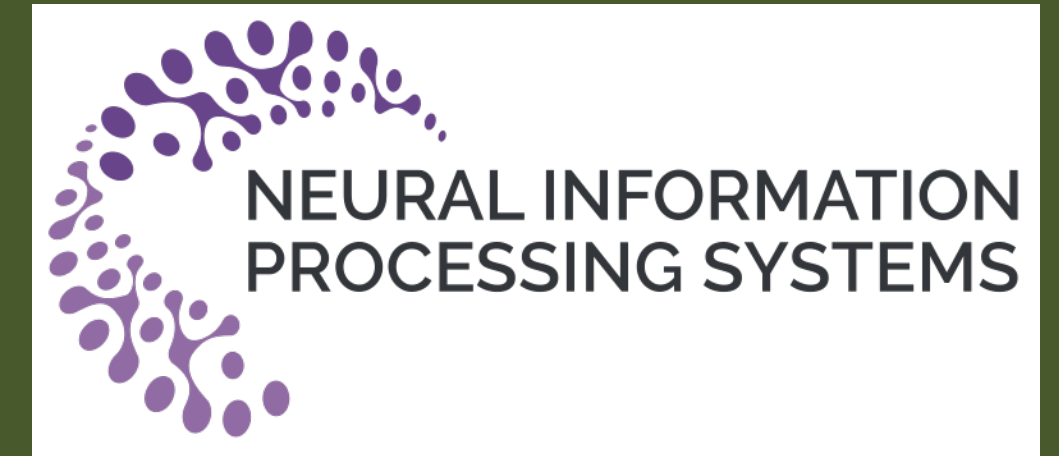

## Gradient Preconditioning in Deep Learning

Gradient-based optimization

Preconditioned gradient

$$\theta_{t+1} \leftarrow \theta_t - \eta P_t g_t$$

Parameter

Preconditioning matrix

Gradient

How to deal with *nonconvexity*, *stochasticity*, and *high dimensionality* in Deep Learning?

Background & problem: A **diverse set** of gradient preconditioning methods

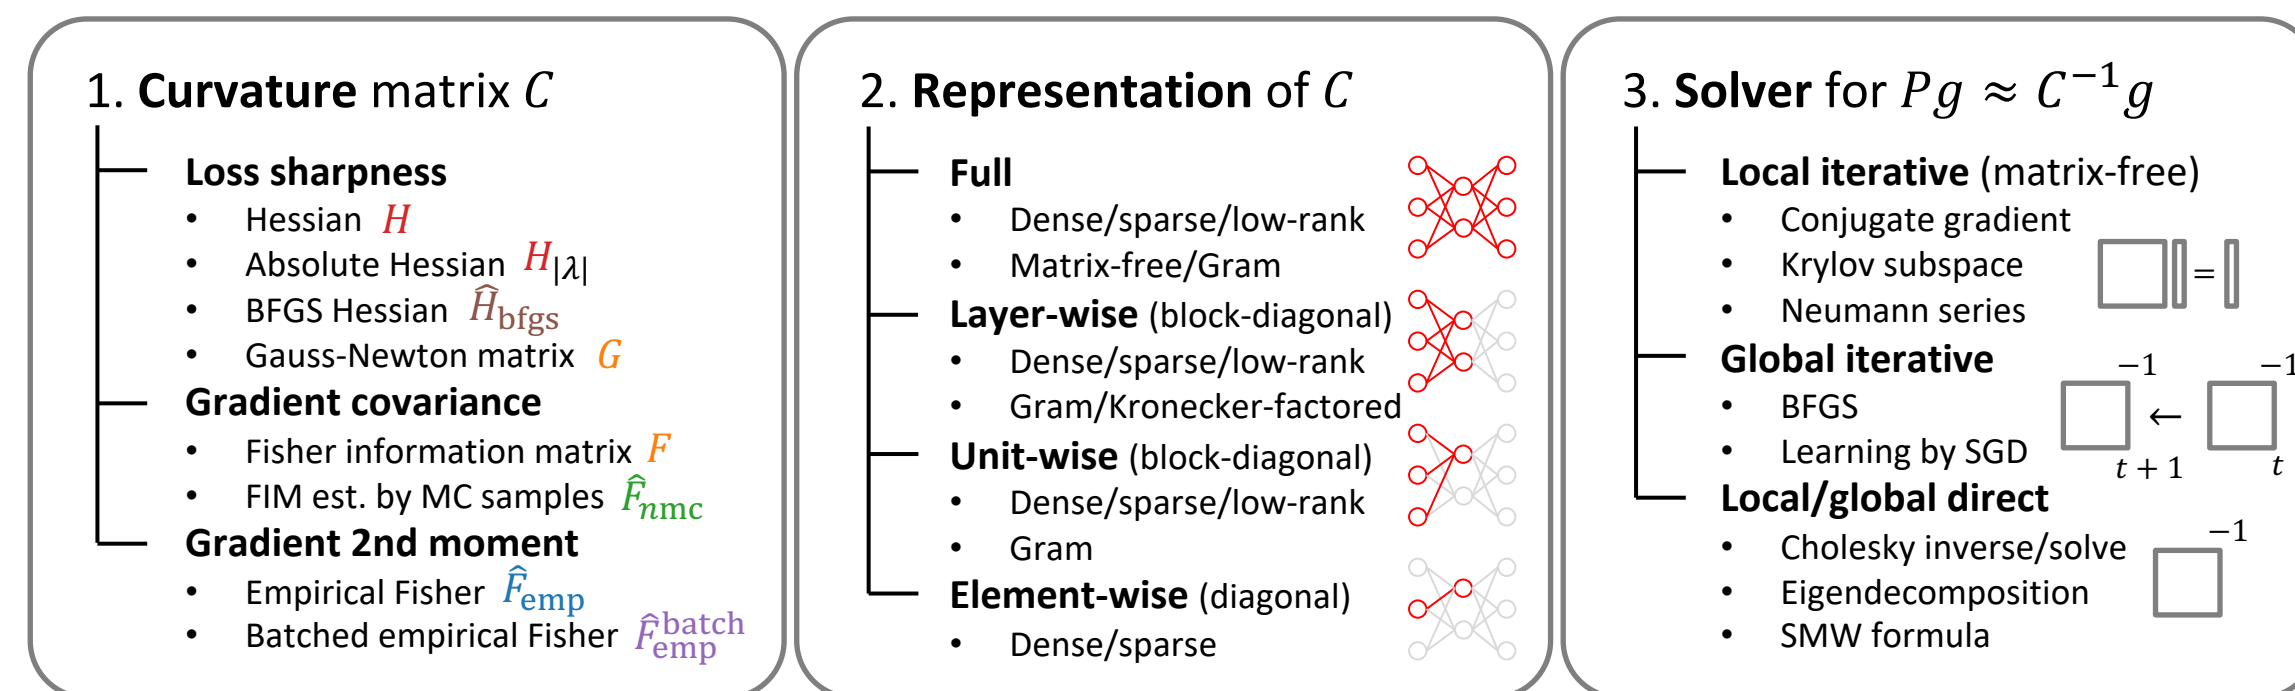

"KF-io": input-output Kronecker-factored. "KF-dim": dimension-wise Kronecker-factored. "RR": rank reduction. "SMW": Sherman-Morrison-Woodbury formula. "L": local = one mini-batch at one time step. "G": global = multiple mini-batches at multiple time steps. "iter": iterative.

| Method                                    | 1. Curvature matrix $C$     |                                | 2. Representation of $C$ |             | 3. Solver for $Pg \approx C^{-1}g$ |                              |
|-------------------------------------------|-----------------------------|--------------------------------|--------------------------|-------------|------------------------------------|------------------------------|
|                                           | type                        | matrix                         | granularity              | format      | type                               | key operations               |
| LiSSA (Agarwal et al., 2017)              | sharpness                   | $H$                            | full                     | dense       | G iter                             | Neumann series               |
| PSGD (Li, 2018)                           | sharpness                   | $H_{ \lambda }$                | full                     | dense       | G iter                             | triangular solve & SGD       |
| Neumann optimizer (Krishnan et al., 2017) | sharpness                   | $H$                            | full                     | matrix-free | L iter                             | Neumann series               |
| Hessian-free (Martens, 2010)              | sharpness                   | $H, G$                         | full                     | matrix-free | L iter                             | conjugate gradient           |
| KSD (Vinyals & Povey, 2011)               | sharpness                   | $H, G$                         | full                     | matrix-free | L iter                             | Krylov subspace method       |
| L-BFGS (Liu & Nocedal, 1989)              | sharpness                   | $\hat{H}_{bfgs}$               | full                     | matrix-free | G iter                             | approx. BFGS                 |
| SMW-GN (Ren & Goldfarb, 2019)             | sharpness                   | $G$                            | full                     | Gram, RR    | L direct                           | SMW inverse                  |
| SMW-NG (Ren & Goldfarb, 2019)             | grad 2 <sup>nd</sup> m      | $\hat{F}_{emp}$                | full                     | Gram, RR    | L direct                           | SMW inverse                  |
| TONGA (Roux et al., 2008)                 | grad 2 <sup>nd</sup> m      | $\hat{F}_{emp}$                | full                     | Gram, RR    | G direct                           | SMW solve & eigendecomp.     |
| M-FAC (Frantar et al., 2021)              | grad 2 <sup>nd</sup> m      | $\hat{F}_{batch emp}$          | full                     | Gram, RR    | G direct                           | SMW solve                    |
| GGT (Agarwal et al., 2019)                | grad 2 <sup>nd</sup> m      | $(\hat{F}_{emp})^{1/2}$        | full                     | Gram, RR    | G direct                           | SMW solve                    |
| FANG (Grosse & Salakhutdinov, 2015)       | grad cov                    | $\hat{F}_{nmc}$                | full                     | sparse      | L/G direct                         | incomplete Cholesky          |
| ★ PSGD (KF) (Li, 2018)                    | sharpness                   | $H_{ \lambda }$                | layer                    | KF-io       | G iter                             | triangular solve & SGD       |
| ★ K-BFGS (Goldfarb et al., 2021)          | sharpness                   | $\hat{H}_{bfgs}$               | layer                    | KF-io       | G iter                             | BFGS                         |
| ★ K-FAC (Martens & Grosse, 2015)          | grad cov, 2 <sup>nd</sup> m | $\hat{F}_{nmc}, \hat{F}_{emp}$ | layer                    | KF-io       | L/G direct                         | Cholesky inverse             |
| KFLR (Botev et al., 2017)                 | grad cov                    | $\hat{F}$                      | layer                    | KF-io       | L/G direct                         | Cholesky inverse             |
| KFRA (Botev et al., 2017)                 | grad cov, 2 <sup>nd</sup> m | $\hat{F}_{nmc}, \hat{F}_{emp}$ | layer                    | KF-io       | L/G direct                         | Cholesky inverse & recursion |
| EKFAC (George et al., 2018)               | grad cov, 2 <sup>nd</sup> m | $\hat{F}_{emp}$                | layer                    | KF-io       | L/G direct                         | eigendecomp. (or SVD)        |
| SKFAC (Yang et al., 2021)                 | grad cov, 2 <sup>nd</sup> m | $\hat{F}_{lmc}, \hat{F}_{emp}$ | layer                    | KF-io, RR   | L direct                           | SMW inverse & reduction      |
| ★ SENG (Yang et al., 2021)                | grad 2 <sup>nd</sup> m      | $\hat{F}_{emp}$                | layer                    | Gram, RR    | L/G direct                         | SMW inverse & sketching      |
| TNT (Ren & Goldfarb, 2021)                | grad cov, 2 <sup>nd</sup> m | $\hat{F}_{nmc}, \hat{F}_{emp}$ | layer                    | KF-dim      | L direct                           | Cholesky inverse             |
| ★ Shampoo (Gupta et al., 2018)            | grad 2 <sup>nd</sup> m      | $(\hat{F}_{batch emp})^{1/2}$  | layer                    | KF-dim      | G direct                           | eigendecomp.                 |
| unit-wise NG (Ollivier, 2015)             | grad cov, 2 <sup>nd</sup> m | $\hat{F}_{nmc}, \hat{F}_{emp}$ | unit                     | dense       | L/G direct                         | Cholesky inverse             |
| TONGA (unit) (Roux et al., 2008)          | grad 2 <sup>nd</sup> m      | $\hat{F}_{emp}$                | unit                     | Gram, RR    | G direct                           | SMW solve & eigendecomp.     |
| AdaHessian (Yao et al., 2020b)            | sharpness                   | $H_{ \lambda }$                | element                  | dense       | G direct                           | element-wise division        |
| SFN (Dauphin et al., 2014)                | sharpness                   | $H_{ \lambda }$                | element                  | dense       | L/G direct                         | element-wise division        |
| Equilibrated SGD (Dauphin et al., 2015)   | sharpness                   | $H_{ \lambda }$                | element                  | dense       | L/G direct                         | element-wise division        |
| AdaGrad (Duchi et al., 2011)              | grad 2 <sup>nd</sup> m      | $(\hat{F}_{batch emp})^{1/2}$  | element                  | dense       | G direct                           | element-wise division        |
| Adam (Kingma & Ba, 2015)                  | grad 2 <sup>nd</sup> m      | $(\hat{F}_{emp})^{1/2}$        | element                  | dense       | G direct                           | element-wise division        |

★: methods to be analyzed in this study

- ✗ Each requires **algorithm-specific** and **complex** implementations.
- ✗ The **compute performance**, **prediction accuracy**, and **feasibility** (time and memory) are **highly dependent** on **neural network architectures** and **specific training settings**.

## Automatic Second-order Differentiation Library (ASDL)

Our solution: A unified interface by ASDL

- ✓ ASDL offers **various implementations** and a **unified interface** for gradient preconditioning in PyTorch (an automatic-differentiation library).
- ✓ ASDL enables an **easy integration of gradient preconditioning into a training** with procedures that are **algorithm-independent** and as **simple** (same logical structure) as the standard training pipeline (see the figure on the right.)
- ✓ ASDL works with **arbitrary deep neural networks** defined with basic building blocks (e.g., nn.Linear, nn.Conv2d, nn.BatchNormNd, nn.LayerNorm, nn.Embedding) in PyTorch.

ASDL enables **flexible switching** and **structured comparison** of gradient preconditioning methods in DL

Standard training pipeline in PyTorch

```
For x, t in data_loader:
    optimizer.zero_grad()

    # Compute mini-batch gradient g
    y = model(x)
    loss = F.cross_entropy(y, t)
    loss.backward()

    optimizer.step()
```

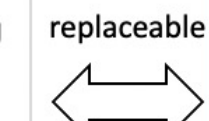

Unified interface to compute **preconditioned** mini-batch gradient  $Pg$

```
gm = XXXGradientMaker(model, XXXGradientConfig())
dummy_y = gm.setup_model_call(model, x)
gm.setup_loss_call(F.cross_entropy, dummy_y, t)
y, loss = gm.forward_and_backward()
```

equivalent to

```
# PSGD [PsgdGradientMaker]
y = model(x)
loss = F.cross_entropy(y, t)
if step % interval == 0:
    grads = torch.autograd.grad(
        loss, params,
        create_graph=True)
    vs = [torch.randn_like(p)
          for p in params]
    Hvs = torch.autograd.grad(
        grads, params,
        grad_outputs=vs)
    update_preconditioner(vs, Hvs)
else:
    loss.backward()
    precondition()

# K-FAC (lmc) [KfacGradientMaker]
if step % interval == 0:
    with extend(operations):
        y = model(x)
        loss = F.cross_entropy(y, t)
        log_p = F.log_softmax(y)
        with torch.no_grad():
            t_mc = Categorical(p).sample()
            nll = F.nll_loss(log_p, t_mc)
            nll.backward(retain_graph=True)
        update_preconditioner()
else:
    y = model(x)
    loss = F.cross_entropy(y, t)
    loss.backward()
    precondition()

# SENG [SengGradientMaker]
if step % interval == 0:
    with extend(operations):
        y = model(x)
        loss = F.cross_entropy(
            y, t, reduction='sum')
        loss.backward()
        truncate_and_sketch()
        calculate_gram_inv()
        loss /= data_size
    else:
        y = model(x)
        loss = F.cross_entropy(
            y, t, reduction='mean')
        loss.backward()
        precondition()
```

Unified interface for gradient preconditioning in PyTorch. XXXGradientMaker ("XXX": algorithm name), offered by ASDL, hides *algorithm-specific* and *complex* operations for  $Pg$  in a *unified* way. For training without gradient preconditioning, GradientMaker computes  $g$  with the same interface (i.e., no need to switch scripts).

## Case Studies with ASDL

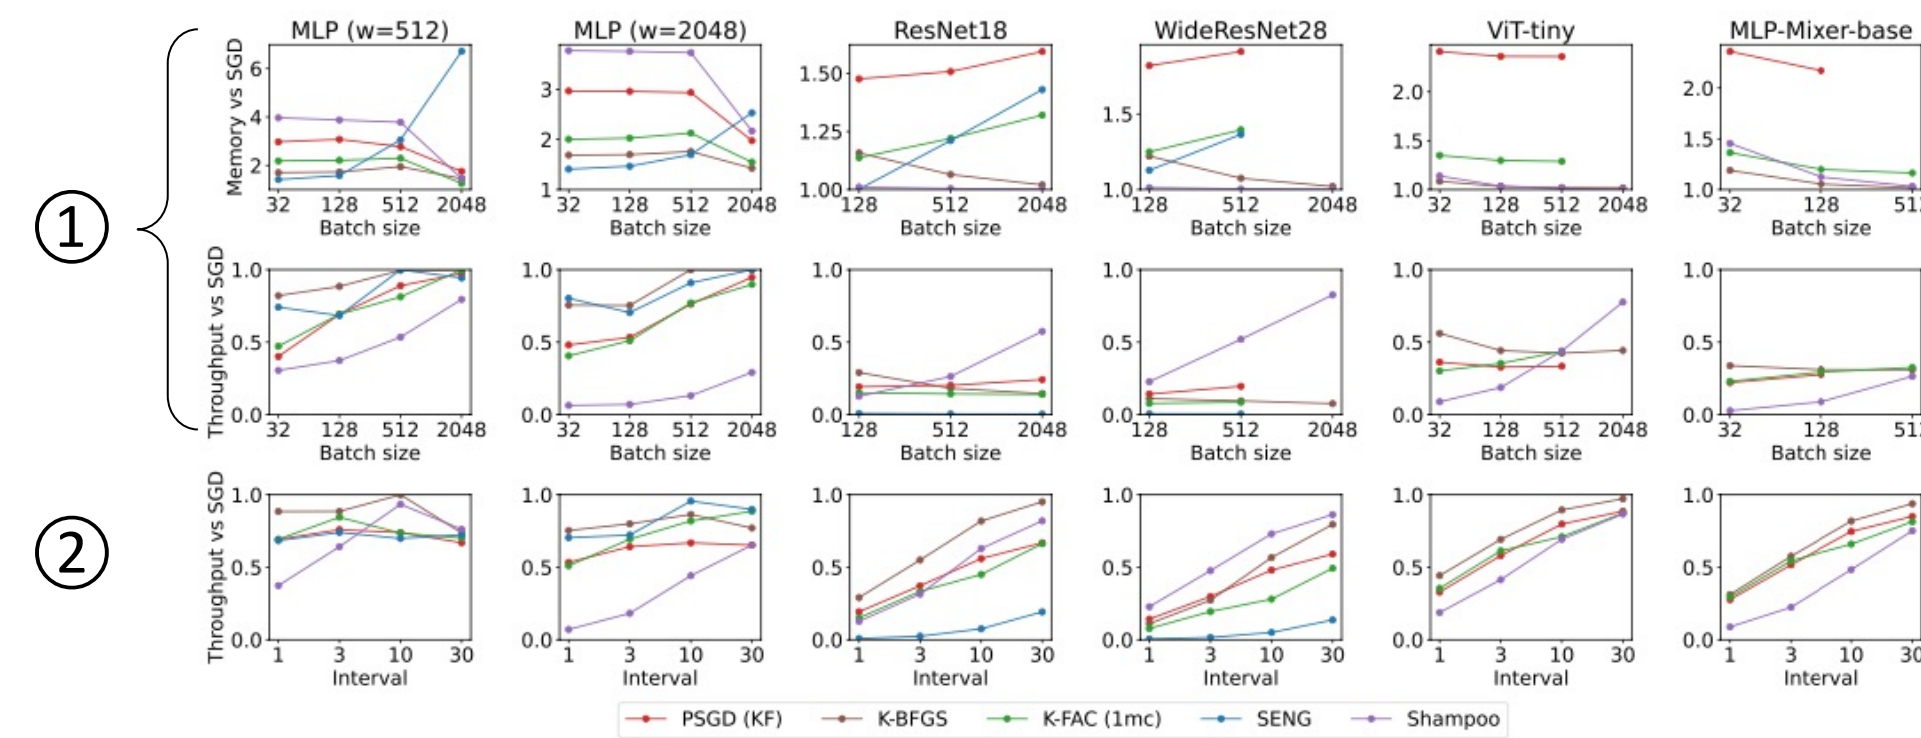

The ratio of **peak memory** ( $\geq 1$ ) (top) and **throughput** [image/s] ( $\leq 1$ ) (middle, bottom) of gradient preconditioning methods compared to SGD with various mini-batch sizes  $B$  and matrix ( $C$  and  $P$ ) update intervals  $T$ , measured on a NVIDIA A100 GPU. For the middle row,  $T=1$ . For the bottom row,  $B=128$ . Missing points are due to the GPU memory limitation.

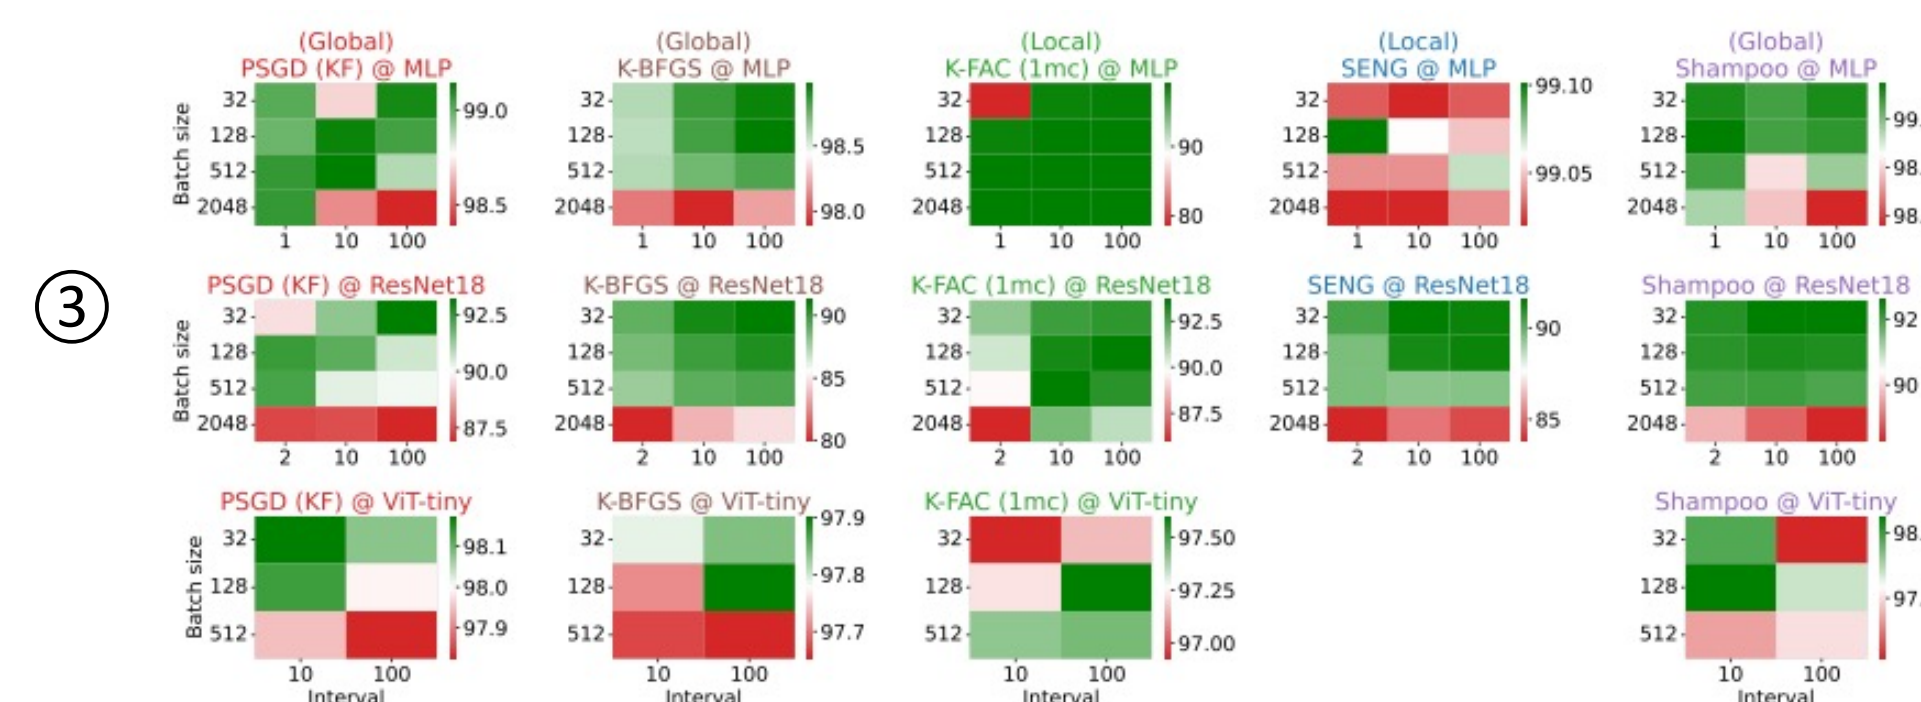

**Sensitivity of the mini-batch size and matrix update interval** to the test accuracy (the best value among different learning rates for each pair is shown). The type of the solver ("Global" or "Local") is indicated at the top of each column. For SENG at ViT-tiny, the plot is not shown because it is not feasible with large mini-batch sizes and only  $B=32$  results are available.

The **test accuracy** for models achieving the best validation accuracy. For each task, the best accuracy is bolded. "w": width. For ResNet18, the results with 20 and 100 epochs are shown (the number of epochs is fixed for the others). SENG consumes lots of memory and is infeasible with MLP-Mixer-base.

| Method      | MNIST       |             |              | CIFAR-10           |              |             |                |
|-------------|-------------|-------------|--------------|--------------------|--------------|-------------|----------------|
|             | MLP (w=128) | MLP (w=512) | MLP (w=2048) | ResNet18           | WideResNet28 | ViT-tiny    | MLP-Mixer-base |
| SGD         | <b>98.9</b> | 99.1        | <b>99.2</b>  | 91.2 / 95.7        | 96.7         | 97.8        | 97.2           |
| AdamW       | 98.7        | 99.0        | 99.1         | 89.9 / 94.8        | 96.0         | 97.9        | <b>97.7</b>    |
| PSGD (KF)   | <b>98.9</b> | 99.1        | <b>99.2</b>  | 93.3 / <b>96.2</b> | 96.6         | <b>98.0</b> | 97.5           |
| K-BFGS      | 98.7        | 98.9        | 99.0         | 91.4 / 95.7        | 96.5         | 97.7        | 97.5           |
| K-FAC (lmc) | 98.8        | <b>99.2</b> | <b>99.2</b>  | <b>93.6</b> / 96.1 | <b>96.9</b>  | 97.4        | <b>97.7</b>    |
| SENG        | 98.8        | 99.0        | 99.1         | 91.6 / 95.8        | 96.6         | 97.7        | -              |
| Shampoo     | 98.8        | 99.1        | <b>99.2</b>  | 92.5 / 96.1        | <b>96.9</b>  | <b>98.0</b> | 97.4           |

❖ Key observations

- ① **SENG** achieves a high throughput w/ a low memory cost w/ a small mini-batch (and vice versa). For **PSGD**, **K-BFGS**, **K-FAC**, and **Shampoo**, memory and throughput ratios improve w/ a large mini-batch (**Shampoo** is particularly slow for most networks otherwise).
- ② Increasing the matrix update interval significantly improves the throughput, but the degree of speedup depends on methods.
- ③ "Global" methods (**PSGD**, **K-BFGS**, **Shampoo**) tend to perform better w/ a smaller mini-batch size while a "Local" one (**K-FAC**) tends to perform better w/ a larger mini-batch size.
- ④ The best test accuracy for each task is achieved by one of the gradient preconditioning methods, but the best performing method depends on the task.

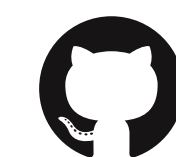

<https://github.com/kazukiosawa/asdl>

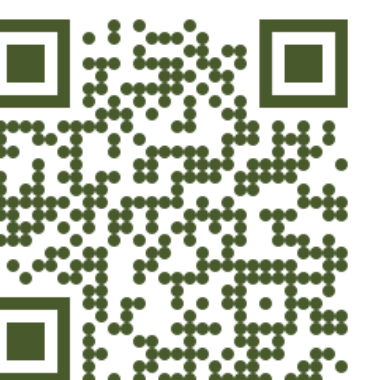

Supplement: supplementary_material [file attachment]
